# Supplementary material for: Altered DNA Methylation in Leukocytes with Trisomy 21
Source: PubMed Central journal article supplement (PMC2987931; doi:10.1371/journal.pgen.1001212), 2010-11-18

Suppl. Figure S2

A.

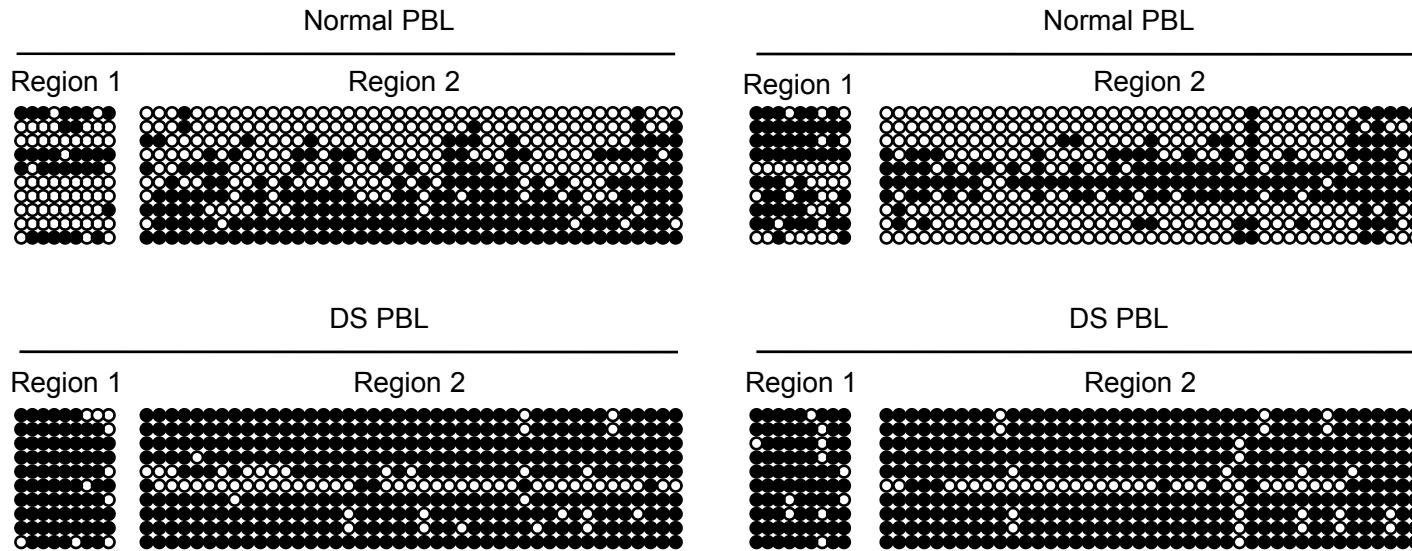

B.

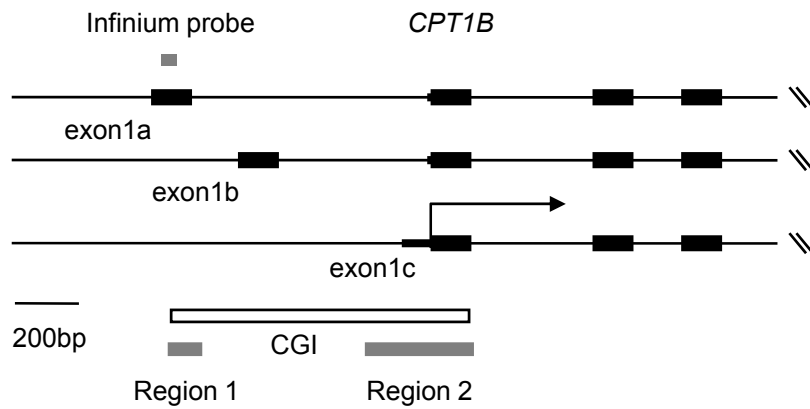

C.

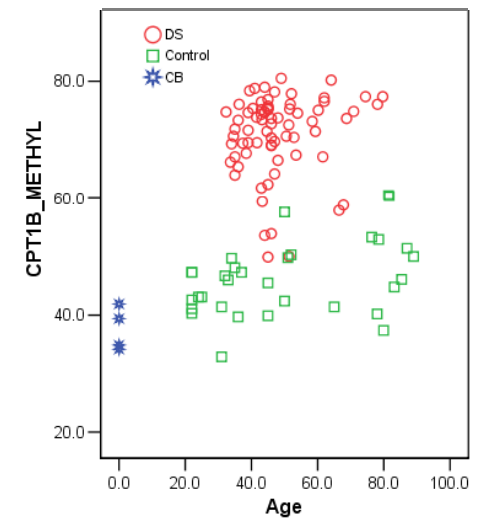

Supplement: pgen.1001212.s002.pdf [file pgen.1001212.s002.pdf]
