# Supplementary material for: Altered DNA Methylation in Leukocytes with Trisomy 21
Source: PubMed Central journal article supplement (PMC2987931; doi:10.1371/journal.pgen.1001212), 2010-11-18

Suppl. Figure S7

DS PBL (n=41) Av % methyl. = 27.1  
Normal PBL (n=29) Av % methyl. = 20.7  
T-test p=0.0001

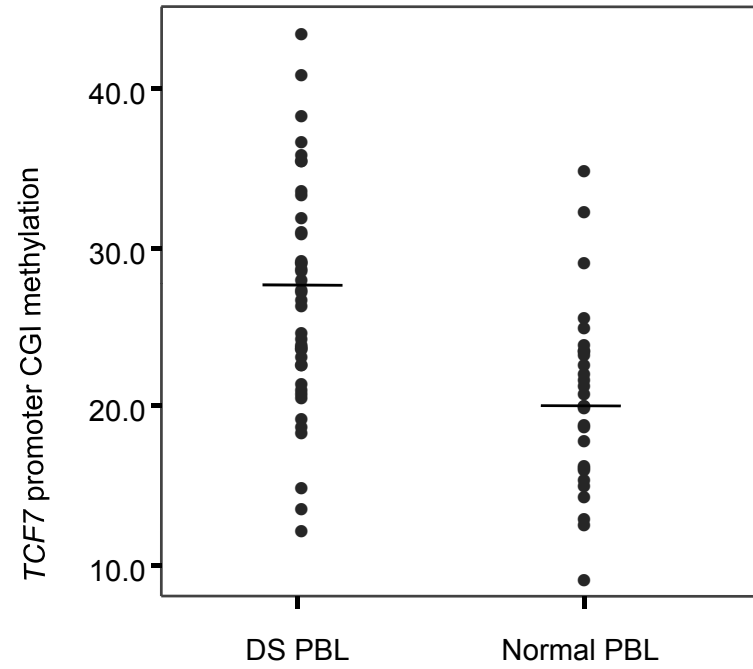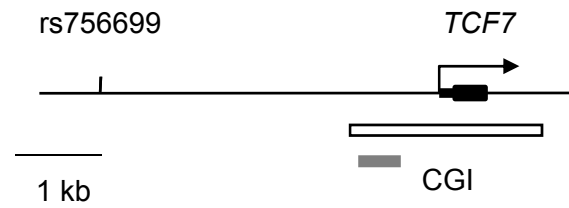

Supplement: pgen.1001212.s007.pdf [file pgen.1001212.s007.pdf]
