# Supplementary material for: Altered DNA Methylation in Leukocytes with Trisomy 21
Source: PubMed Central journal article supplement (PMC2987931; doi:10.1371/journal.pgen.1001212), 2010-11-18
Supplement: pgen.1001212.s008.pdf [file pgen.1001212.s008.pdf]

| probe set     | dbSNP RS ID | Chr | Cytoband | Associated Gene(s) | Product(s)                                                      | SNP Position Relative to Gene(s) | DS PBL av | Control PBL av | DS / Control | DS - Control |
|---------------|-------------|-----|----------|--------------------|-----------------------------------------------------------------|----------------------------------|-----------|----------------|--------------|--------------|
| SNP_A-2305831 | rs11863621  | 16  | q23.3    | CDH13              | member of the cadherin superfamily                              | intergenic                       | 0.722     | 0.298571429    | 2.41818182   | 0.423428571  |
| SNP_A-1974529 | rs1720830   | 3   | q22.3    | FAM62C             | family with sequence similarity 62 member C                     | promoter CGI                     | 0.732     | 0.32           | 2.2875       | 0.412        |
| SNP_A-1785577 | rs2654974   | 15  | q26.3    | LOC145814          |                                                                 | intron                           | 0.862     | 0.391428571    | 2.20218978   | 0.470571429  |
| SNP_A-4249213 | rs2294309   | 6   | p22.1    | ZNF184             | zinc finger protein                                             | upstream                         | 0.522     | 0.24           | 2.175        | 0.282        |
| SNP_A-2104584 | rs360529    | 20  | p12.1    | SPTLC3             | serine palmitoyltransferase                                     | intron                           | 0.452     | 0.221428571    | 2.04129032   | 0.230571429  |
| SNP_A-4287008 | rs9318544   | 13  | q31.1    | POU4F1             | class IV POU domain-containing transcription factor             | intergenic                       | 0.894     | 0.467142857    | 1.91376147   | 0.426857143  |
| SNP_A-1877369 | rs16941688  | 18  | p11.32   | ----               |                                                                 | intergenic                       | 0.276     | 0.145714286    | 1.89411765   | 0.130285714  |
| SNP_A-1953165 | rs11651551  | 17  | q25.1    | SDK2               | member of the immunoglobulin superfamily                        | upstream                         | 0.386     | 0.208571429    | 1.85068493   | 0.177428571  |
| SNP_A-1870762 | rs2167594   | 15  | q21.1    | B2M /// TRIM69     | beta-2-microglobulin//RING-B-box-coiled-coil family             | downstream /// upstream          | 0.148     | 0.082857143    | 1.7862069    | 0.065142857  |
| SNP_A-2313951 | rs7539505   | 1   | q24.3    | KIAA0859           |                                                                 | downstream                       | 0.842     | 0.485714286    | 1.73352941   | 0.356285714  |
| SNP_A-2111041 | rs7552818   | 1   | q42.13   | WNT9A              | member of the WNT gene family                                   | downstream                       | 0.628     | 0.377142857    | 1.66515152   | 0.250857143  |
| SNP_A-2222429 | rs17012263  | 2   | q14.2    | C1QL2              | complement component 1, q subcomponent-like 2                   | downstream                       | 0.628     | 0.381428571    | 1.64644195   | 0.246571429  |
| SNP_A-1885541 | rs6558962   | 8   | p23.2    | CSMD1              | CUB and sushi domain-containing protein                         | intergenic                       | 0.536     | 0.33           | 1.62424242   | 0.206        |
| SNP_A-2294769 | rs8011143   | 14  | q11.2    | ABHD4              | abhydrolase domain containing 4                                 | promoter CGI; intron 1           | 0.108     | 0.067142857    | 1.60851064   | 0.040857143  |
| SNP_A-1812148 | rs4413548   | 5   | q35.3    | PROP1              | PROP paired-like homeobox 1                                     | downstream                       | 0.682     | 0.428571429    | 1.59133333   | 0.253428571  |
| SNP_A-1994721 | rs719213    | 8   | q23.3    | CSMD3              | CUB and sushi domain-containing protein                         | upstream                         | 0.184     | 0.115714286    | 1.59012346   | 0.068285714  |
| SNP_A-1983012 | rs898355    | 5   | q22.3    | KCNN2              | potassium intermediate/small conductance calcium-activated      | intron                           | 0.498     | 0.317142857    | 1.57027027   | 0.180857143  |
| SNP_A-2200145 | rs17207640  | 22  | q11.21   | TUBA8 /// USP18    | tubulin, alpha 8//ubiquitin specific peptidase 18               | promoter CGI /// downstream      | 0.194     | 0.125714286    | 1.54318182   | 0.068285714  |
| SNP_A-2003622 | rs909077    | 14  | q11.2    | TCRA               | T-cell receptor alpha chain                                     | intron                           | 0.816     | 0.537142857    | 1.51914894   | 0.278857143  |
| SNP_A-2149238 | rs4959782   | 6   | p25.2    | TUBB2B /// PSMG4   | beta isoform of tubulin//roteasome assembly chaperone           | upstream /// upstream            | 0.18      | 0.118571429    | 1.51807229   | 0.061428571  |
| SNP_A-2079967 | rs12533831  | 7   | q36.1    | GBX1 /// ASB10     | gastrulation brain homeobox//ankyrin repeat and SOCS box-       | upstream /// downstream          | 0.56      | 0.37           | 1.51351351   | 0.19         |
| SNP_A-2245624 | rs304350    | 4   | q32.3    | ----               |                                                                 | intergenic                       | 0.44      | 0.294285714    | 1.49514563   | 0.145714286  |
| SNP_A-2061534 | rs6467723   | 7   | q33      | CREB3L2            | cAMP responsive element binding protein                         | intron                           | 0.41      | 0.274285714    | 1.49479167   | 0.135714286  |
| SNP_A-1792622 | rs4949308   | 1   | p35.2    | LAPTM5 /// SDC3    | lysosomal protein transmembrane 5//syndecan proteoglycan        | intergenic                       | 1.436     | 0.97           | 1.48041237   | 0.466        |
| SNP_A-2168378 | rs1550862   | 2   | p21      | ----               |                                                                 | intergenic                       | 0.782     | 0.528571429    | 1.47945946   | 0.253428571  |
| SNP_A-2267500 | rs1966618   | 3   | q29      | BDH1               | short-chain dehydrogenase/reductase gene family                 | promoter CGI; intron 2           | 0.486     | 0.331428571    | 1.46637931   | 0.154571429  |
| SNP_A-4276450 | rs10002498  | 4   | p12      | NFXL1 /// CNGA1    | nuclear transcription factor, X-box binding-like 1//protein inv | upstream /// downstream          | 0.314     | 0.218571429    | 1.43660131   | 0.095428571  |
| SNP_A-1808274 | rs11134037  | 5   | p15.33   | ///                |                                                                 | intergenic                       | 0.746     | 0.527142857    | 1.41517615   | 0.218857143  |
| SNP_A-2249260 | rs1146297   | 1   | p12      | MAN1A2             | member of family 38 of the glycosyl hydrolases                  | promoter CGI                     | 0.348     | 0.247142857    | 1.40809249   | 0.100857143  |
| SNP_A-2312342 | rs11648858  | 16  | q24.1    | COX4NB             | neighbor of COX4                                                | intron                           | 0.36      | 0.255714286    | 1.40782123   | 0.104285714  |
| SNP_A-1891502 | rs2290526   | 8   | q12.1    | TOX                | thymocyte selection-associated high mobility group box prot     | promoter CGI                     | 0.372     | 0.264285714    | 1.40756757   | 0.107714286  |
| SNP_A-2039835 | rs2048253   | 3   | q27.2    | C3orf70 /// EHHADH | hypothetical protein LOC285382 //enzyme in peroxisomal bi       | upstream /// downstream          | 0.91      | 0.647142857    | 1.40618102   | 0.262857143  |
| SNP_A-2206655 | rs924041    | 6   | q27      | ----               |                                                                 | intergenic                       | 0.764     | 0.545714286    | 1.4          | 0.218285714  |
| SNP_A-4243924 | rs17057654  | 3   | p14.3    | ARHGEF3            | Rho guanine nucleotide exchange factor                          | intron                           | 0.636     | 0.462857143    | 1.37407407   | 0.173142857  |
| SNP_A-1907500 | rs1014422   | 15  | q26.2    | ----               |                                                                 | intergenic                       | 1.056     | 0.768571429    | 1.3739777    | 0.287428571  |
| SNP_A-4271635 | rs12218684  | 10  | q26.2    | ----               |                                                                 | intergenic                       | 0.88      | 0.644285714    | 1.36585366   | 0.235714286  |
| SNP_A-2147411 | rs11145647  | 9   | q21.2    | GNAQ               | guanine nucleotide-binding protein                              | intron                           | 0.774     | 0.57           | 1.35789474   | 0.204        |
| SNP_A-1862688 | rs11766104  | 7   | p21.1    | AHR                | aryl hydrocarbon receptor                                       | intergenic                       | 0.88      | 0.655714286    | 1.34204793   | 0.224285714  |
| SNP_A-2133790 | rs6713219   | 2   | q23.3    | STAM2              | signal transducing adaptor molecule (SH3 domain and ITAM        | upstream                         | 0.732     | 0.547142857    | 1.33785901   | 0.184857143  |

|               |            |    |        |          |                                                                |                           |       |             |            |             |
|---------------|------------|----|--------|----------|----------------------------------------------------------------|---------------------------|-------|-------------|------------|-------------|
| SNP_A-2079187 | rs16978757 | 19 | p13.13 | KLF1     | Kruppel-like factor 1                                          | exon 1; near promoter CGI | 0.468 | 0.35        | 1.33714286 | 0.118       |
| SNP_A-4296997 | rs16836497 | 4  | p16.2  | CYTL1    | cytokine-like protein                                          | intergenic                | 0.93  | 0.698571429 | 1.33128834 | 0.231428571 |
| SNP_A-2266761 | rs10849538 | 12 | p13.31 | LRRC23   | leucine rich repeat containing 23                              | intron                    | 0.508 | 0.382857143 | 1.32686567 | 0.125142857 |
| SNP_A-2021059 | rs2887763  | 11 | q24.1  | ----     |                                                                | intergenic                | 0.248 | 0.187142857 | 1.32519084 | 0.060857143 |
| SNP_A-1840668 | rs16947926 | 17 | p12    | HS3ST3A1 | heparan sulfate (glucosamine) 3-O-sulfotransferase 3A1         | downstream                | 1.336 | 1.01        | 1.32277228 | 0.326       |
| SNP_A-1994007 | rs16907621 | 8  | q21.13 | ----     |                                                                | intergenic                | 1.106 | 0.837142857 | 1.32116041 | 0.268857143 |
| SNP_A-1960078 | rs12023763 | 1  | q23.3  | ----     |                                                                | intergenic                | 1.302 | 0.987142857 | 1.31895803 | 0.314857143 |
| SNP_A-2212570 | rs8192650  | 8  | q24.13 | ZHX2     | zinc fingers and homeoboxes gene family                        | upstream                  | 1.07  | 0.812857143 | 1.31634446 | 0.257142857 |
| SNP_A-2064773 | rs17496910 | 4  | p15.31 | ----     |                                                                | intergenic                | 0.956 | 0.727142857 | 1.31473477 | 0.228857143 |
| SNP_A-1894207 | rs3019442  | 6  | q26    | PARK2    | component of a multiprotein E3 ubiquitin ligase complex, me    | intron                    | 0.632 | 0.482857143 | 1.30887574 | 0.149142857 |
| SNP_A-2211111 | rs2185384  | 1  | q32.2  | KCNH1    | potassium voltage-gated channel, subfamily H, member 1         | intron                    | 0.776 | 0.594285714 | 1.30576923 | 0.181714286 |
| SNP_A-2145267 | rs10967965 | 9  | p21.2  | MOBKLB   |                                                                | intron                    | 1.262 | 0.974285714 | 1.29530792 | 0.287714286 |
| SNP_A-1821379 | rs2187431  | 18 | q21.1  | ZBTB7C   | zinc finger and BTB domain containing 7C                       | intron                    | 0.784 | 0.622857143 | 1.2587156  | 0.161142857 |
| SNP_A-1938991 | rs7097422  | 10 | p12.1  | KIAA1217 |                                                                | intron                    | 0.99  | 0.815714286 | 1.21366025 | 0.174285714 |
| SNP_A-2031660 | rs4766772  | 12 | q24.21 | ----     |                                                                | intergenic                | 0.57  | 0.69        | 0.82608696 | -0.12       |
| SNP_A-2120497 | rs3947662  | 1  | p36.32 | AJAP1    | adherens junctions associated protein 1                        | intron                    | 0.542 | 0.711428571 | 0.76184739 | -0.16942857 |
| SNP_A-2175482 | rs11855819 | 15 | q14    | TMCO5A   | transmembrane and coiled-coil domains 5A                       | upstream                  | 0.476 | 0.638571429 | 0.74541387 | -0.16257143 |
| SNP_A-4287344 | rs17164354 | 5  | p15.2  | ----     |                                                                | intergenic                | 0.638 | 0.901428571 | 0.70776545 | -0.26342857 |
| SNP_A-1929546 | rs17068501 | 13 | q14.13 | LRCH1    | leucine-rich repeats and calponin homology (CH) domain con     | intron                    | 0.6   | 0.848571429 | 0.70707071 | -0.24857143 |
| SNP_A-4286506 | rs12911169 | 15 | q13.1  | KIAA0574 |                                                                | intron                    | 0.634 | 0.9         | 0.70444444 | -0.266      |
| SNP_A-4304825 | rs2763948  | 13 | q32.3  | CLYBL    | citrate lyase beta like                                        | intron                    | 0.526 | 0.754285714 | 0.69734848 | -0.22828571 |
| SNP_A-4270660 | rs2839419  | 21 | q22.3  | C2CD2    | C2 calcium-dependent domain containing 2                       | intron                    | 0.316 | 0.461428571 | 0.68482972 | -0.14542857 |
| SNP_A-4270423 | rs7283121  | 21 | q22.11 | MRAP     | melanocortin 2 receptor accessory protein                      | intron                    | 0.378 | 0.555714286 | 0.68020566 | -0.17771429 |
| SNP_A-1909701 | rs4806371  | 19 | q12    | ----     |                                                                | intergenic                | 0.49  | 0.737142857 | 0.66472868 | -0.24714286 |
| SNP_A-2008183 | rs7113375  | 11 | p15.1  | SAA2     | serum amyloid A2                                               | intron                    | 0.454 | 0.697142857 | 0.65122951 | -0.24314286 |
| SNP_A-2179466 | rs756699   | 5  | q31.1  | TCF7     | transcription factor 7 (T-cell specific, HMG-box)              | upstream                  | 0.386 | 0.597142857 | 0.64641148 | -0.21114286 |
| SNP_A-2183520 | rs1947384  | 8  | p21.1  | C8orf80  | hypothetical protein LOC389643                                 | intron                    | 0.608 | 0.968571429 | 0.62772861 | -0.36057143 |
| SNP_A-2066201 | rs2909985  | 7  | q11.22 | CALN1    | similarity to the calcium-binding proteins of the calmodulin f | intron                    | 0.406 | 0.655714286 | 0.61917211 | -0.24971429 |
| SNP_A-2083869 | rs114873   | 12 | q21.33 | ----     |                                                                | intergenic                | 0.42  | 0.71        | 0.5915493  | -0.29       |
| SNP_A-1870078 | rs4328485  | 17 | q24.3  | KCNJ2    | potassium inwardly-rectifying channel, subfamily J, member     | downstream                | 0.498 | 0.965714286 | 0.51568047 | -0.46771429 |
| SNP_A-2136365 | rs6760008  | 2  | q11.2  | TMEM131  | transmembrane protein 131                                      | intron/alt promoter       | 0.3   | 0.671428571 | 0.44680851 | -0.37142857 |
