# Supplementary material for: Altered DNA Methylation in Leukocytes with Trisomy 21
Source: PubMed Central journal article supplement (PMC2987931; doi:10.1371/journal.pgen.1001212), 2010-11-18
Supplement: pgen.1001212.s009.pdf [file pgen.1001212.s009.pdf]

| probe set  | Chr | MapInfo   | Symbol         | Product                                               | Av DS | Av Control | Av DS / Av Control | Av DS - Av Control | O.R.     | Coefficient |
|------------|-----|-----------|----------------|-------------------------------------------------------|-------|------------|--------------------|--------------------|----------|-------------|
| cg05590257 | 17  | 17050295  | PLD6_LOC201164 | hypothetical protein LOC201164                        | 0.35  | 0.12       | 2.93               | 0.23               | 0.00E+00 | -2.15E+01   |
| cg01351032 | 16  | 10878692  | CIITA          | class II transactivator                               | 0.21  | 0.08       | 2.67               | 0.13               | 0.00E+00 | -1.50E+01   |
| cg20727114 | 19  | 54885932  | CPT1C          | carnitine palmitoyltransferase 1C                     | 0.30  | 0.11       | 2.61               | 0.18               | 0.00E+00 | -1.93E+01   |
| cg15633390 | 4   | 100070234 | EIF4E          | eukaryotic translation initiation factor 4E           | 0.32  | 0.12       | 2.61               | 0.20               | 0.00E+00 | -1.66E+01   |
| cg00230502 | 12  | 118256764 | CCDC60         | hypothetical protein LOC160777                        | 0.22  | 0.09       | 2.60               | 0.14               | 0.00E+00 | -1.90E+01   |
| cg14859460 | 5   | 178354850 | GRM6           | glutamate receptor; metabotropic 6 precursor          | 0.32  | 0.12       | 2.55               | 0.19               | 0.00E+00 | -1.16E+01   |
| cg08822227 | 4   | 2790266   | SH3BP2         | SH3-domain binding protein 2                          | 0.45  | 0.18       | 2.45               | 0.26               | 0.00E+00 | -1.07E+01   |
| cg14972143 | 4   | 100070026 | EIF4E          | eukaryotic translation initiation factor 4E           | 0.30  | 0.13       | 2.39               | 0.17               | 0.00E+00 | -1.81E+01   |
| cg02880176 | 17  | 17050542  | PLD6_LOC201164 | hypothetical protein LOC201164                        | 0.23  | 0.10       | 2.34               | 0.13               | 0.00E+00 | -1.52E+01   |
| cg14159672 | 1   | 204085802 | FLJ32569       | hypothetical protein LOC148811                        | 0.46  | 0.20       | 2.33               | 0.26               | 2.00E-04 | -8.73E+00   |
| cg13105904 | 14  | 23969884  | KIAA0323       | hypothetical protein LOC23351                         | 0.39  | 0.18       | 2.15               | 0.21               | 2.90E-02 | -3.54E+00   |
| cg13906813 | 6   | 33148892  | HLA-DPA1       | major histocompatibility complex; class II; DP alpha  | 0.43  | 0.21       | 2.08               | 0.22               | 0.00E+00 | -1.47E+01   |
| cg08832227 | 12  | 4890954   | KCNA1          | potassium voltage-gated channel; shaker-related       | 0.41  | 0.21       | 1.96               | 0.20               | 0.00E+00 | -2.92E+01   |
| cg00983520 | 22  | 49363933  | CPT1B          | carnitine palmitoyltransferase 1B isoform a           | 0.57  | 0.29       | 1.93               | 0.27               | 0.00E+00 | -1.27E+01   |
| cg07991621 | 4   | 2790277   | SH3BP2         | SH3-domain binding protein 2                          | 0.49  | 0.26       | 1.93               | 0.24               | 5.00E-04 | -7.61E+00   |
| cg22730004 | 1   | 156923342 | SPTA1          | spectrin; alpha; erythrocytic 1 (elliptocytosis 2)    | 0.37  | 0.20       | 1.92               | 0.18               | 0.00E+00 | -1.14E+01   |
| cg11507178 | 11  | 118286725 | BCL9L          | B-cell CLL/lymphoma 9-like                            | 0.40  | 0.21       | 1.88               | 0.19               | 0.00E+00 | -1.46E+01   |
| cg10557828 | 3   | 147362332 | PLOD2          | procollagen-lysine; 2-oxoglutarate 5-dioxygenase      | 0.35  | 0.19       | 1.85               | 0.16               | 0.00E+00 | -1.06E+01   |
| cg00660989 | 14  | 44502266  | BTBD5          | BTB (POZ) domain containing 5                         | 0.53  | 0.29       | 1.84               | 0.24               | 5.00E-04 | -7.68E+00   |
| cg20974196 | 19  | 810983    | CFD            | complement factor D preproprotein                     | 0.31  | 0.17       | 1.79               | 0.14               | 0.00E+00 | -2.43E+01   |
| cg12448933 | 17  | 70178973  | RAB37          | RAB37; member RAS oncogene family isoform 1           | 0.23  | 0.13       | 1.78               | 0.10               | 0.00E+00 | -2.58E+01   |
| cg21053323 | 21  | 45061813  | SUMO3          | small ubiquitin-like modifier protein 3               | 0.44  | 0.25       | 1.77               | 0.19               | 0.00E+00 | -1.47E+01   |
| cg15439196 | 10  | 104666897 | CNNM2          | cyclin M2 isoform 3                                   | 0.35  | 0.20       | 1.70               | 0.14               | 0.00E+00 | -3.79E+01   |
| cg14917512 | 19  | 3045685   | GNA11          | guanine nucleotide binding protein (G protein); alpha | 0.30  | 0.18       | 1.69               | 0.12               | 0.00E+00 | -2.12E+01   |
| cg14893161 | 1   | 204085874 | FLJ32569       | hypothetical protein LOC148811                        | 0.56  | 0.33       | 1.69               | 0.23               | 0.00E+00 | -1.10E+01   |
| cg13749822 | 4   | 145786113 | HHIP           | hedgehog-interacting protein                          | 0.48  | 0.28       | 1.68               | 0.19               | 0.00E+00 | -2.94E+01   |
| cg04739570 | 3   | 128831301 | PODXL2         | endoglycan                                            | 0.39  | 0.23       | 1.67               | 0.16               | 0.00E+00 | -1.35E+01   |
| cg02498063 | 12  | 118256960 | CCDC60         | hypothetical protein LOC160777                        | 0.65  | 0.39       | 1.66               | 0.26               | 0.00E+00 | -1.41E+01   |
| cg05822532 | 7   | 73080467  | ELN            | elastin                                               | 0.51  | 0.31       | 1.64               | 0.20               | 6.00E-04 | -7.44E+00   |
| cg21376883 | 1   | 234916855 | ACTN2          | actinin; alpha 2                                      | 0.27  | 0.17       | 1.64               | 0.11               | 0.00E+00 | -3.08E+01   |
| cg15642326 | 19  | 50445986  | MARK4          | MAP/microtubule affinity-regulating kinase 4          | 0.33  | 0.20       | 1.63               | 0.13               | 0.00E+00 | -2.14E+01   |
| cg26711820 | 12  | 79625820  | MYF6           | myogenic factor 6 (herculin)                          | 0.26  | 0.16       | 1.61               | 0.10               | 0.00E+00 | -4.68E+01   |
| cg05968233 | 19  | 6323277   | ALKBH7         | spermatogenesis associated 11                         | 0.33  | 0.21       | 1.60               | 0.12               | 0.00E+00 | -1.18E+01   |
| cg22341310 | 19  | 52740395  | ZNF541         | zinc finger protein 541                               | 0.28  | 0.18       | 1.57               | 0.10               | 0.00E+00 | -1.64E+01   |
| cg09697795 | 19  | 55358191  | SCRL           | hypothetical protein LOC126123                        | 0.28  | 0.18       | 1.57               | 0.10               | 0.00E+00 | -3.24E+01   |
| cg06896207 | 19  | 2046364   | MOBK2A         | MOB-LAK                                               | 0.43  | 0.27       | 1.56               | 0.15               | 0.00E+00 | -2.52E+01   |
| cg03454353 | 9   | 114859185 | ZFP37          | zinc finger protein 37 homolog                        | 0.34  | 0.22       | 1.56               | 0.12               | 0.00E+00 | -2.20E+01   |
| cg07612655 | 20  | 47618924  | PTGIS          | prostaglandin I2 (prostacyclin) synthase              | 0.44  | 0.28       | 1.56               | 0.16               | 0.00E+00 | -2.22E+01   |

|            |    |           |           |                                                        |      |      |      |      |          |           |
|------------|----|-----------|-----------|--------------------------------------------------------|------|------|------|------|----------|-----------|
| cg16907514 | 14 | 55115851  | KTN1      | kinectin 1                                             | 0.42 | 0.27 | 1.56 | 0.15 | 3.00E-04 | -8.28E+00 |
| cg16786458 | 5  | 149089013 | PPARGC1B  | PGC-1-related estrogen receptor alpha coactivator      | 0.53 | 0.34 | 1.53 | 0.18 | 0.00E+00 | -2.36E+01 |
| cg11004890 | 20 | 3166500   | SLC4A11   | solute carrier family 4 member 11                      | 0.64 | 0.43 | 1.51 | 0.22 | 1.00E-04 | -9.40E+00 |
| cg16334795 | 21 | 41460764  | BACE2     | beta-site APP-cleaving enzyme 2 isoform A precursor    | 0.44 | 0.29 | 1.51 | 0.15 | 0.00E+00 | -1.92E+01 |
| cg08431931 | 22 | 40724605  | MGC26816  | hypothetical protein LOC164684                         | 0.42 | 0.28 | 1.50 | 0.14 | 1.39E-02 | -4.28E+00 |
| cg22919728 | 3  | 127725180 | CHST13    | carbohydrate (chondroitin 4) sulfotransferase 13       | 0.52 | 0.34 | 1.50 | 0.17 | 2.00E-04 | -8.45E+00 |
| cg22165685 | 10 | 134901282 | VENTX     | VENT homeobox                                          | 0.45 | 0.30 | 1.49 | 0.15 | 0.00E+00 | -1.49E+01 |
| cg04156850 | 17 | 70914167  | GRB2      | growth factor receptor-bound protein 2 isoform 1       | 0.33 | 0.22 | 1.48 | 0.11 | 0.00E+00 | -2.71E+01 |
| cg15804973 | 6  | 137156206 | MAP3K5    | mitogen-activated protein kinase kinase kinase 5       | 0.38 | 0.25 | 1.48 | 0.12 | 2.20E-03 | -6.14E+00 |
| cg01405107 | 17 | 44026634  | HOXB5     | homeo box B5                                           | 0.51 | 0.34 | 1.48 | 0.16 | 0.00E+00 | -1.62E+01 |
| cg06500079 | 17 | 565783    | VPS53     | VPS53 protein                                          | 0.37 | 0.25 | 1.47 | 0.12 | 0.00E+00 | -3.96E+01 |
| cg27120999 | 14 | 64077803  | HSPA2     | heat shock 70kDa protein 2                             | 0.50 | 0.34 | 1.46 | 0.16 | 7.00E-04 | -7.24E+00 |
| cg23616741 | 7  | 44071959  | PGAM2     | phosphoglycerate mutase 2 (muscle)                     | 0.54 | 0.38 | 1.45 | 0.17 | 0.00E+00 | -2.31E+01 |
| cg02196655 | 2  | 10748215  | NOL10     | nucleolar protein 10                                   | 0.49 | 0.34 | 1.43 | 0.15 | 2.71E-02 | -3.61E+00 |
| cg12564453 | 16 | 55553341  | CETP      | cholesteryl ester transfer protein; plasma precursor   | 0.85 | 0.60 | 1.43 | 0.26 | 4.10E-03 | -5.50E+00 |
| cg27390220 | 3  | 45243527  | RIS1      | Ras-induced senescence 1                               | 0.57 | 0.40 | 1.42 | 0.17 | 0.00E+00 | -2.24E+01 |
| cg16604218 | 1  | 45225192  | EIF2B3    | eukaryotic translation initiation factor 2B; subunit   | 0.41 | 0.29 | 1.42 | 0.12 | 0.00E+00 | -3.73E+01 |
| cg13302154 | 12 | 14930699  | MGP       | matrix Gla protein                                     | 0.45 | 0.32 | 1.41 | 0.13 | 0.00E+00 | -1.34E+01 |
| cg25948180 | 11 | 34893357  | PDHX      | pyruvate dehydrogenase complex; component X            | 0.43 | 0.31 | 1.40 | 0.12 | 0.00E+00 | -1.81E+01 |
| cg27631817 | 6  | 10168924  | OFCC1     | MRDS1                                                  | 0.36 | 0.25 | 1.40 | 0.10 | 0.00E+00 | -3.06E+01 |
| cg21096966 | 14 | 44502208  | BTBD5     | BTB (POZ) domain containing 5                          | 0.68 | 0.49 | 1.40 | 0.19 | 0.00E+00 | -1.03E+01 |
| cg24107665 | 8  | 144444307 | ZNF696    | zinc finger protein 696                                | 0.36 | 0.26 | 1.39 | 0.10 | 0.00E+00 | -1.79E+01 |
| cg18881501 | 17 | 21127969  | MAP2K3    | mitogen-activated protein kinase kinase 3 isoform      | 0.38 | 0.27 | 1.39 | 0.11 | 0.00E+00 | -1.68E+01 |
| cg09462576 | 1  | 226364496 | MRPL55    | mitochondrial ribosomal protein L55 isoform a          | 0.58 | 0.41 | 1.39 | 0.16 | 0.00E+00 | -1.04E+01 |
| cg06806711 | 11 | 59979867  | MS4A1     | membrane-spanning 4-domains; subfamily A; member       | 0.43 | 0.31 | 1.39 | 0.12 | 0.00E+00 | -2.38E+01 |
| cg20035459 | 16 | 3008708   | CLDN6     | claudin 6                                              | 0.58 | 0.42 | 1.38 | 0.16 | 0.00E+00 | -3.09E+01 |
| cg26372517 | 1  | 35811746  | TFAP2E    | transcription factor AP-2 epsilon (activating enhancer | 0.51 | 0.37 | 1.38 | 0.14 | 0.00E+00 | -1.62E+01 |
| cg11120551 | 1  | 145180620 | CHD1L     | chromodomain helicase DNA binding protein 1-like       | 0.43 | 0.31 | 1.38 | 0.12 | 0.00E+00 | -2.48E+01 |
| cg16991589 | 13 | 24568047  | PABPC3    | poly(A) binding protein; cytoplasmic 3                 | 0.54 | 0.39 | 1.37 | 0.14 | 3.72E+01 | 3.62E+00  |
| cg08409225 | 12 | 54904004  | OBFC2B    | hypothetical protein LOC79035                          | 0.47 | 0.34 | 1.37 | 0.13 | 0.00E+00 | -3.75E+01 |
| cg25133685 | 6  | 29121315  | OR2W1     | olfactory receptor; family 2; subfamily W; member      | 0.52 | 0.38 | 1.36 | 0.14 | 0.00E+00 | -2.89E+01 |
| cg08137040 | 7  | 126820931 | LOC168850 | hypothetical protein LOC168850                         | 0.39 | 0.29 | 1.36 | 0.10 | 0.00E+00 | -4.42E+01 |
| cg20743744 | 4  | 1233849   | CTBP1     | C-terminal binding protein 1 isoform 1                 | 0.43 | 0.31 | 1.35 | 0.11 | 0.00E+00 | -2.99E+01 |
| cg00839584 | 2  | 113258562 | IL1A      | interleukin 1; alpha proprotein                        | 0.64 | 0.47 | 1.35 | 0.17 | 0.00E+00 | -3.41E+01 |
| cg26057752 | 7  | 44071460  | PGAM2     | phosphoglycerate mutase 2 (muscle)                     | 0.61 | 0.45 | 1.35 | 0.16 | 0.00E+00 | -2.88E+01 |
| cg15352829 | 14 | 104462063 | PLD4      | phospholipase D family; member 4                       | 0.41 | 0.30 | 1.35 | 0.10 | 0.00E+00 | -1.08E+01 |
| cg05670596 | 3  | 46423500  | CCRL2     | chemokine (C-C motif) receptor-like 2                  | 0.39 | 0.29 | 1.34 | 0.10 | 0.00E+00 | -1.85E+01 |
| cg00846036 | 11 | 84311774  | DLG2      | chapsyn-110                                            | 0.50 | 0.37 | 1.34 | 0.13 | 0.00E+00 | -3.26E+01 |
| cg10669058 | 19 | 19509555  | CILP2     | cartilage intermediate layer protein 2                 | 0.60 | 0.45 | 1.34 | 0.15 | 0.00E+00 | -1.93E+01 |
| cg24674703 | 11 | 60626536  | CD5       | CD5 antigen (p56-62)                                   | 0.54 | 0.41 | 1.34 | 0.14 | 0.00E+00 | -2.62E+01 |
| cg14920846 | 1  | 199884832 | NAV1      | neuron navigator 1                                     | 0.75 | 0.56 | 1.34 | 0.19 | 0.00E+00 | -1.17E+01 |

|            |    |           |            |                                                        |      |      |      |       |          |           |
|------------|----|-----------|------------|--------------------------------------------------------|------|------|------|-------|----------|-----------|
| cg13975369 | 7  | 129867789 | TSGA14     | testis specific; 14                                    | 0.47 | 0.35 | 1.32 | 0.11  | 0.00E+00 | -3.33E+01 |
| cg14460735 | 1  | 244795350 | C1orf71    | hypothetical protein LOC163882                         | 0.50 | 0.38 | 1.32 | 0.12  | 0.00E+00 | -3.82E+01 |
| cg24019851 | 3  | 50289295  | SEMA3B     | semaphorin 3B isoform 2 precursor                      | 0.68 | 0.52 | 1.31 | 0.16  | 0.00E+00 | -1.32E+01 |
| cg15284635 | 3  | 10833504  | SLC6A11    | solute carrier family 6 (neurotransmitter transporter) | 0.53 | 0.41 | 1.30 | 0.12  | 0.00E+00 | -5.34E+01 |
| cg24169822 | 7  | 27137519  | HOXA4      | homeobox protein A4                                    | 0.69 | 0.54 | 1.29 | 0.16  | 0.00E+00 | -2.42E+01 |
| cg26453588 | 22 | 41835965  | BIK        | BCL2-interacting killer                                | 0.58 | 0.45 | 1.29 | 0.13  | 0.00E+00 | -2.40E+01 |
| cg12158019 | 1  | 40009903  | OXCT2      | 3-oxoacid CoA transferase 2                            | 0.67 | 0.52 | 1.29 | 0.15  | 0.00E+00 | -1.66E+01 |
| cg01399317 | 8  | 144882327 | FLJ46072   | hypothetical protein LOC286077                         | 0.82 | 0.64 | 1.28 | 0.18  | 0.00E+00 | -2.96E+01 |
| cg19664945 | 2  | 53940847  | GPR75      | G protein-coupled receptor 75                          | 0.61 | 0.78 | 0.79 | -0.16 | 2.18E+11 | 2.61E+01  |
| cg15095327 | 3  | 9919512   | IL17RE     | interleukin 17 receptor E isoform 3                    | 0.42 | 0.54 | 0.78 | -0.12 | 2.92E+09 | 2.18E+01  |
| cg01459453 | 1  | 167865836 | SELP       | selectin P precursor                                   | 0.54 | 0.70 | 0.78 | -0.16 | 2.00E+04 | 9.91E+00  |
| cg17250929 | 1  | 151780434 | S100A5     | S100 calcium binding protein A5                        | 0.36 | 0.47 | 0.77 | -0.11 | 1.41E+07 | 1.65E+01  |
| cg21929875 | 11 | 124127306 | VSIG2      | V-set and immunoglobulin domain containing 2           | 0.68 | 0.90 | 0.76 | -0.22 | 1.34E+11 | 2.56E+01  |
| cg04861271 | 14 | 22859371  | PABPN1     | poly(A) binding protein; nuclear 1                     | 0.67 | 0.90 | 0.74 | -0.23 | 1.23E+05 | 1.17E+01  |
| cg03874127 | 6  | 109275828 | ARMC2      | armadillo repeat containing 2                          | 0.40 | 0.55 | 0.73 | -0.15 | 2.04E+06 | 1.45E+01  |
| cg07220939 | 11 | 64115193  | SLC22A12   | urate anion exchanger 1 isoform a                      | 0.29 | 0.41 | 0.71 | -0.12 | 6.50E+09 | 2.26E+01  |
| cg05181279 | 11 | 11939370  | RIG        | hypothetical protein LOC10530                          | 0.51 | 0.71 | 0.71 | -0.21 | 1.20E+08 | 1.86E+01  |
| cg00579402 | 19 | 5789999   | FUT6       | fucosyltransferase 6 (alpha (1;3) fucosyltransferase)  | 0.49 | 0.71 | 0.69 | -0.22 | 3.42E+09 | 2.20E+01  |
| cg22563815 | 15 | 76644004  | CHRNA5     | cholinergic receptor; nicotinic; alpha polypeptide 5   | 0.38 | 0.55 | 0.69 | -0.17 | 5.55E+05 | 1.32E+01  |
| cg18382305 | 18 | 29275063  | C18orf34   | hypothetical protein LOC374864                         | 0.31 | 0.45 | 0.69 | -0.14 | 8.12E+07 | 1.82E+01  |
| cg11787522 | 15 | 72282162  | STRA6      | stimulated by retinoic acid gene 6 homolog             | 0.23 | 0.33 | 0.68 | -0.11 | 1.09E+07 | 1.62E+01  |
| cg01919208 | 3  | 49145500  | LAMB2      | laminin; beta 2 precursor                              | 0.34 | 0.50 | 0.68 | -0.16 | 6.01E+08 | 2.02E+01  |
| cg26581729 | 9  | 139059613 | NPDC1      | neural proliferation; differentiation and control; 1   | 0.31 | 0.45 | 0.68 | -0.15 | 1.02E+10 | 2.30E+01  |
| cg08471713 | 17 | 39094419  | MEOX1      | mesenchyme homeo box 1 isoform 2                       | 0.40 | 0.59 | 0.68 | -0.19 | 1.06E+03 | 6.96E+00  |
| cg20857253 | 21 | 32879161  | TCP10L     | T-complex 10A-2                                        | 0.26 | 0.39 | 0.67 | -0.13 | 4.07E+08 | 1.98E+01  |
| cg23732182 | 21 | 43722518  | C21orf84   | hypothetical protein LOC114038                         | 0.39 | 0.58 | 0.67 | -0.19 | 3.78E+07 | 1.74E+01  |
| cg09809672 | 1  | 234624305 | EDARADD    | EDAR-associated death domain isoform B                 | 0.32 | 0.48 | 0.67 | -0.16 | 3.80E+11 | 2.67E+01  |
| cg26743024 | 17 | 62390744  | CACNG4     | voltage-dependent calcium channel gamma-4 subunit      | 0.30 | 0.45 | 0.67 | -0.15 | 7.44E+04 | 1.12E+01  |
| cg02082342 | 11 | 124127583 | VSIG2      | V-set and immunoglobulin domain containing 2           | 0.50 | 0.76 | 0.66 | -0.26 | 3.89E+10 | 2.44E+01  |
| cg03543593 | 6  | 32184395  | TNXB       | tenascin XB isoform 2                                  | 0.30 | 0.46 | 0.65 | -0.16 | 3.83E+07 | 1.75E+01  |
| cg17983064 | 5  | 131424256 | IL3        | interleukin 3 precursor                                | 0.44 | 0.68 | 0.64 | -0.25 | 2.59E+07 | 1.71E+01  |
| cg01479232 | 20 | 696992    | C20orf54   | hypothetical protein LOC113278                         | 0.39 | 0.64 | 0.62 | -0.24 | 5.22E+08 | 2.01E+01  |
| cg21918500 | 1  | 245402094 | ZNF124     | zinc finger protein 124                                | 0.16 | 0.27 | 0.59 | -0.11 | 2.68E+06 | 1.48E+01  |
| cg07732037 | 12 | 122273780 | MPHOSPH9   | M-phase phosphoprotein 9                               | 0.16 | 0.28 | 0.57 | -0.12 | 1.63E+07 | 1.66E+01  |
| cg09554443 | 1  | 165754386 | CD3Z_CD247 | T-cell receptor zeta chain isoform 2 precursor         | 0.14 | 0.26 | 0.55 | -0.12 | 1.03E+06 | 1.38E+01  |
| cg12024906 | 19 | 42517519  | HKR1       | GLI-Kruppel family member HKR1                         | 0.20 | 0.37 | 0.55 | -0.16 | 9.24E+09 | 2.29E+01  |
| cg13185177 | 3  | 195601174 | GP5        | glycoprotein V (platelet)                              | 0.30 | 0.55 | 0.55 | -0.25 | 1.31E+08 | 1.87E+01  |
| cg04972979 | 20 | 697148    | C20orf54   | hypothetical protein LOC113278                         | 0.16 | 0.31 | 0.50 | -0.16 | 2.66E+11 | 2.63E+01  |
| cg09871315 | 7  | 27109207  | HOXA2      | homeobox A2                                            | 0.10 | 0.20 | 0.48 | -0.11 | 9.46E+18 | 4.37E+01  |
