# Supplementary material for: Altered DNA Methylation in Leukocytes with Trisomy 21
Source: PubMed Central journal article supplement (PMC2987931; doi:10.1371/journal.pgen.1001212), 2010-11-18
Supplement: pgen.1001212.s010.pdf [file pgen.1001212.s010.pdf]

| Gene           | median value controls | median value DS | DS Study ID number | Age  | Percent methylation (MS Pyroseq) |
|----------------|-----------------------|-----------------|--------------------|------|----------------------------------|
| <i>TCF7</i>    | 44                    | 24.8            | 33                 | 64.4 | 23.1                             |
|                |                       |                 | 33                 | 67.8 | 22.5                             |
|                |                       |                 | 33                 | 70.9 | 27.0                             |
|                |                       |                 | 691                | 62.6 | 21.1                             |
|                |                       |                 | 691                | 65.4 | 21.1                             |
|                |                       |                 | 691                | 68.7 | 26.0                             |
|                |                       |                 | 162                | 47   | 24.9                             |
|                |                       |                 | 162                | 50   | 27.2                             |
|                |                       |                 | 162                | 53   | 20.0                             |
|                |                       |                 | 162                | 54   | 23.0                             |
|                |                       |                 | 178                | 45   | 33.5                             |
|                |                       |                 | 178                | 50   | 32.0                             |
|                |                       |                 | 178                | 52   | 26.3                             |
|                |                       |                 | 178                | 54   | 22.4                             |
|                |                       |                 | 564                | 54   | 20.1                             |
|                |                       |                 | 564                | 57.2 | 20.0                             |
|                |                       |                 | 122                | 78   | 36.1                             |
|                |                       |                 | 122                | 79.7 | 36.9                             |
| <i>TMEM131</i> | 39.2                  | 9.2             | 33                 | 64.4 | 8.5                              |
|                |                       |                 | 33                 | 67.8 | 9.6                              |
|                |                       |                 | 33                 | 70.9 | 13.2                             |
|                |                       |                 | 162                | 47   | 14.4                             |
|                |                       |                 | 162                | 50   | 18.6                             |
|                |                       |                 | 162                | 53   | 13.7                             |
|                |                       |                 | 162                | 54   | 20.9                             |
|                |                       |                 | 178                | 45   | 1.8                              |
|                |                       |                 | 178                | 50   | 4.6                              |
|                |                       |                 | 178                | 52   | 6.1                              |
|                |                       |                 | 178                | 54   | 3.3                              |
|                |                       |                 | 691                | 62.6 | 6.3                              |
|                |                       |                 | 691                | 65.4 | 6.1                              |
|                |                       |                 | 691                | 68.7 | 5.0                              |
|                |                       |                 | 564                | 54   | 8.3                              |
|                |                       |                 | 564                | 57.2 | 5.4                              |
|                |                       |                 | 122                | 78   | 4.5                              |
|                |                       |                 | 122                | 79.7 | 6.8                              |
