# Supplementary material for: Altered DNA Methylation in Leukocytes with Trisomy 21
Source: PubMed Central journal article supplement (PMC2987931; doi:10.1371/journal.pgen.1001212), 2010-11-18
Supplement: pgen.1001212.s011.pdf [file pgen.1001212.s011.pdf]

| Lab ID | DS study ID | Age | Karyotype                  | cells with normal diploid karyotype | Gene           | Percent Methylation (MS-Pyroseq) | median value controls | median value DS |
|--------|-------------|-----|----------------------------|-------------------------------------|----------------|----------------------------------|-----------------------|-----------------|
| ds146  | 484         | 51  | 47,XX,+21 (22), 46,XX (78) | 78%                                 | <i>TCF7</i>    | 44.5                             | 44                    | 24.8            |
| ds690  | 1718        | 43  | 47,XX,+21 (16), 46,XX (34) | 68%                                 |                | 37.9                             |                       |                 |
| ds701  | 569         | 56  | 47,XY,+21 (39), 46,XY (11) | 22%                                 |                | 24.5                             |                       |                 |
| ds329  | 122         | 80  | 47,XX,+21 (43), 46,XX (5)  | 10%                                 |                | 36.9                             |                       |                 |
| ds094  | 526         | 62  | 47,XY,+21 (46), 46,XY (4)  | 8%                                  |                | 28.3                             |                       |                 |
| ds146  | 484         | 51  | 47,XX,+21 (22), 46,XX (78) | 78%                                 | <i>TMEM131</i> | 36.6                             | 39.2                  | 9.2             |
| ds690  | 1718        | 43  | 47,XX,+21 (16), 46,XX (34) | 68%                                 |                | 20.7                             |                       |                 |
| ds701  | 569         | 56  | 47,XY,+21 (39), 46,XY (11) | 22%                                 |                | 11.7                             |                       |                 |
| ds329  | 122         | 80  | 47,XX,+21 (43), 46,XX (5)  | 10%                                 |                | 6.8                              |                       |                 |
| ds094  | 526         | 62  | 47,XY,+21 (46), 46,XY (4)  | 8%                                  |                | 10.5                             |                       |                 |
| ds146  | 484         | 51  | 47,XX,+21 (22), 46,XX (78) | 78%                                 | <i>SH3BP2</i>  | 17.9                             | 21.7                  | 31.5            |
| ds690  | 1718        | 43  | 47,XX,+21 (16), 46,XX (34) | 68%                                 |                | 18.2                             |                       |                 |
| ds701  | 569         | 56  | 47,XY,+21 (39), 46,XY (11) | 22%                                 |                | 19.2                             |                       |                 |
| ds329  | 122         | 80  | 47,XX,+21 (43), 46,XX (5)  | 10%                                 |                | 39.4                             |                       |                 |
| ds094  | 526         | 62  | 47,XY,+21 (46), 46,XY (4)  | 8%                                  |                | 41.5                             |                       |                 |
