# Supplementary material for: Altered DNA Methylation in Leukocytes with Trisomy 21
Source: PubMed Central journal article supplement (PMC2987931; doi:10.1371/journal.pgen.1001212), 2010-11-18
Supplement: pgen.1001212.s012.pdf [file pgen.1001212.s012.pdf]

| Case ID           | DS 700 | DS 701 | DS 702 | DS 703 | Mean % Methyl<br>all DS PBL | Mean % Methyl<br>all control PBL |
|-------------------|--------|--------|--------|--------|-----------------------------|----------------------------------|
| <i>TMEM131</i> MI | 15.3   | 11.7   | 13.7   | 7.6    | 10.9                        | 41.1                             |
| <i>TCF7</i> MI    | 27.3   | 24.5   | 32.2   | 33.1   | 26.5                        | 44                               |
| <i>SH3BP2</i> MI  | 46     | 19.21  | 31.53  | 41.5   | 34.5                        | 23.6                             |
|                   |        |        |        |        | <b>Normal Range (%)</b>     |                                  |
| WBC, number       | 7.76   | 5.56   | 3.59   | 4.69   | 3.54-9.06                   |                                  |
| Neutrophils, (%)  | 73.5   | 56.9   | 45     | 54     | 40-70%                      |                                  |
| Lymphocytes, (%)  | 18.4   | 29     | 43.5   | 35     | 20-50%                      |                                  |
| Monocytes, (%)    | 6.4    | 11.9   | 10.3   | 10.2   | 4-8%                        |                                  |
