# Supplementary material for: Altered DNA Methylation in Leukocytes with Trisomy 21
Source: PubMed Central journal article supplement (PMC2987931; doi:10.1371/journal.pgen.1001212), 2010-11-18
Supplement: pgen.1001212.s013.pdf [file pgen.1001212.s013.pdf]

| probe set  | Chrom | Position  | Gene Name | av DS T-cells | av control T-cells | av DS / av control | av DS - av control |
|------------|-------|-----------|-----------|---------------|--------------------|--------------------|--------------------|
| cg14859460 | 5     | 178354850 | GRM6      | 0.46          | 0.11               | 4.33               | 0.35               |
| cg07846220 | 18    | 7107680   | LAMA1     | 0.16          | 0.04               | 4.31               | 0.12               |
| cg24674703 | 11    | 60626536  | CD5       | 0.14          | 0.03               | 4.31               | 0.11               |
| cg22836229 | 8     | 49810270  | EFCAB1    | 0.18          | 0.05               | 3.40               | 0.13               |
| cg10756887 | 22    | 22435692  | C22orf15  | 0.29          | 0.09               | 3.35               | 0.20               |
| cg27009703 | 7     | 27171419  | HOXA9     | 0.22          | 0.07               | 3.21               | 0.15               |
| cg09688546 | 4     | 158216813 | GLRB      | 0.17          | 0.05               | 3.21               | 0.12               |
| cg15731815 | 1     | 6191847   | C1orf188  | 0.22          | 0.07               | 3.19               | 0.15               |
| cg20727114 | 19    | 54885932  | CPT1C     | 0.38          | 0.13               | 2.95               | 0.25               |
| cg23833452 | 6     | 146906445 | RAB32     | 0.18          | 0.06               | 2.94               | 0.12               |
| cg20318748 | 20    | 25553178  | NANP      | 0.23          | 0.08               | 2.83               | 0.15               |
| cg16248277 | 10    | 103526053 | FGF8      | 0.18          | 0.06               | 2.83               | 0.11               |
| cg26504021 | 5     | 2805882   | IRX2      | 0.22          | 0.08               | 2.80               | 0.14               |
| cg14917512 | 19    | 3045685   | GNA11     | 0.30          | 0.11               | 2.74               | 0.19               |
| cg22791453 | 9     | 132309720 | ASS       | 0.22          | 0.08               | 2.73               | 0.14               |
| cg12080675 | 5     | 179267829 | KIAA0676  | 0.23          | 0.08               | 2.73               | 0.14               |
| cg08822227 | 4     | 2790266   | SH3BP2    | 0.55          | 0.21               | 2.69               | 0.35               |
| cg02613386 | 17    | 6620257   | FBXO39    | 0.28          | 0.11               | 2.62               | 0.17               |
| cg04747322 | 5     | 121675207 | SNCAIP    | 0.25          | 0.10               | 2.55               | 0.15               |
| cg08797106 | 6     | 26128987  | HIST1H3A  | 0.17          | 0.07               | 2.54               | 0.10               |
| cg02497700 | 1     | 242279981 | ZNF238    | 0.23          | 0.09               | 2.54               | 0.14               |
| cg22285621 | 11    | 66827898  | SSH3      | 0.24          | 0.10               | 2.53               | 0.15               |
| cg26985289 | 1     | 9807209   | CLSTN1    | 0.21          | 0.09               | 2.47               | 0.13               |
| cg02988947 | 17    | 59132545  | LIMD2     | 0.18          | 0.07               | 2.46               | 0.11               |
| cg21243096 | 1     | 38284144  | POU3F1    | 0.18          | 0.07               | 2.46               | 0.11               |
| cg24794531 | 3     | 143926527 | TRPC1     | 0.17          | 0.07               | 2.45               | 0.10               |
| cg25983380 | 20    | 56898834  | GNAS      | 0.33          | 0.14               | 2.44               | 0.20               |
| cg21561173 | 21    | 14274634  | C21orf81  | 0.32          | 0.13               | 2.38               | 0.18               |
| cg10313673 | 19    | 19510144  | CILP2     | 0.21          | 0.09               | 2.35               | 0.12               |
| cg02600394 | 4     | 47830991  | TXK       | 0.26          | 0.11               | 2.35               | 0.15               |
| cg14972143 | 4     | 100070026 | EIF4E     | 0.25          | 0.11               | 2.34               | 0.14               |
| cg05337441 | 2     | 21120073  | APOB      | 0.21          | 0.09               | 2.33               | 0.12               |
| cg05222924 | 11    | 32407062  | WT1       | 0.27          | 0.12               | 2.32               | 0.15               |
| cg25432696 | 4     | 74921592  | CXCL6     | 0.21          | 0.09               | 2.29               | 0.12               |
| cg02250594 | 18    | 53254351  | ONECUT2   | 0.27          | 0.12               | 2.27               | 0.15               |
| cg13929328 | 10    | 129425888 | FLJ46831  | 0.27          | 0.12               | 2.27               | 0.15               |
| cg16632715 | 2     | 176680359 | HOXD11    | 0.30          | 0.13               | 2.25               | 0.17               |
| cg27118825 | 19    | 51010588  | RSHL1     | 0.30          | 0.14               | 2.22               | 0.17               |
| cg09088834 | 20    | 25513460  | KIAA0980  | 0.34          | 0.16               | 2.18               | 0.18               |
| cg00365193 | 6     | 2944394   | NQO2      | 0.23          | 0.11               | 2.12               | 0.12               |
| cg20029201 | 11    | 118287023 | BCL9L     | 0.47          | 0.22               | 2.12               | 0.25               |
| cg09107315 | 1     | 78284076  | GIPC2     | 0.30          | 0.14               | 2.11               | 0.16               |
| cg24989962 | 14    | 51804036  | PTGDR     | 0.24          | 0.12               | 2.10               | 0.13               |
| cg04887278 | 6     | 83960646  | RWDD2     | 0.28          | 0.14               | 2.10               | 0.15               |
| cg07991621 | 4     | 2790277   | SH3BP2    | 0.54          | 0.26               | 2.10               | 0.28               |
| cg16232126 | 2     | 107969437 | SLC5A7    | 0.22          | 0.11               | 2.08               | 0.11               |

|            |    |           |           |      |      |      |      |
|------------|----|-----------|-----------|------|------|------|------|
| cg24256211 | 14 | 54104965  | SAMD4A    | 0.41 | 0.20 | 2.08 | 0.21 |
| cg22402007 | 9  | 86472643  | NTRK2     | 0.19 | 0.09 | 2.07 | 0.10 |
| cg19450025 | 16 | 30113574  | SULT1A3   | 0.29 | 0.14 | 2.06 | 0.15 |
| cg01806928 | 11 | 7229380   | SYT9      | 0.34 | 0.17 | 2.05 | 0.17 |
| cg10056627 | 6  | 43036751  | GNMT      | 0.21 | 0.10 | 2.05 | 0.11 |
| cg25711779 | 2  | 56003329  | EFEMP1    | 0.22 | 0.11 | 2.05 | 0.11 |
| cg04797323 | 12 | 92491109  | SOCS2     | 0.25 | 0.12 | 2.04 | 0.13 |
| cg08832227 | 12 | 4890954   | KCNA1     | 0.51 | 0.25 | 2.03 | 0.26 |
| cg10660256 | 5  | 78443439  | BHMT      | 0.22 | 0.11 | 2.03 | 0.11 |
| cg15489294 | 5  | 115325752 | FLJ90650  | 0.29 | 0.14 | 2.02 | 0.15 |
| cg25186143 | 17 | 581814    | FAM57A    | 0.32 | 0.16 | 2.02 | 0.16 |
| cg15439196 | 10 | 104666897 | CNNM2     | 0.32 | 0.16 | 1.98 | 0.16 |
| cg02498063 | 12 | 118256960 | CCDC60    | 0.73 | 0.37 | 1.97 | 0.36 |
| cg11507178 | 11 | 118286725 | BCL9L     | 0.38 | 0.19 | 1.97 | 0.19 |
| cg14348532 | 11 | 14950138  | CALCA     | 0.28 | 0.14 | 1.96 | 0.14 |
| cg27491887 | 11 | 2511159   | KCNQ1     | 0.27 | 0.14 | 1.96 | 0.13 |
| cg13870866 | 7  | 35259655  | TBX20     | 0.23 | 0.12 | 1.96 | 0.11 |
| cg20430816 | 4  | 77447378  | GENX-3414 | 0.23 | 0.12 | 1.96 | 0.11 |
| cg09963123 | 4  | 38341049  | KLF3      | 0.29 | 0.15 | 1.95 | 0.14 |
| cg22892110 | 8  | 144870619 | MAPK15    | 0.33 | 0.17 | 1.94 | 0.16 |
| cg11027330 | 16 | 704795    | METRN     | 0.32 | 0.16 | 1.94 | 0.15 |
| cg09626984 | 8  | 11603505  | GATA4     | 0.25 | 0.13 | 1.93 | 0.12 |
| cg13599477 | 10 | 5478485   | NET1      | 0.28 | 0.15 | 1.93 | 0.14 |
| cg10557828 | 3  | 147362332 | PLOD2     | 0.44 | 0.23 | 1.92 | 0.21 |
| cg23616741 | 7  | 44071959  | PGAM2     | 0.59 | 0.31 | 1.91 | 0.28 |
| cg22485810 | 17 | 26272851  | CENTA2    | 0.36 | 0.19 | 1.90 | 0.17 |
| cg15703690 | 7  | 22733517  | IL6       | 0.28 | 0.15 | 1.90 | 0.13 |
| cg03811478 | 3  | 138966386 | SOX14     | 0.28 | 0.15 | 1.90 | 0.13 |
| cg18771300 | 14 | 62741490  | RHOJ      | 0.71 | 0.38 | 1.89 | 0.34 |
| cg25141674 | 6  | 72187410  | C6orf155  | 0.23 | 0.12 | 1.89 | 0.11 |
| cg07638935 | 10 | 102811417 | KAZALD1   | 0.21 | 0.11 | 1.88 | 0.10 |
| cg19601035 | 12 | 46685407  | COL2A1    | 0.23 | 0.12 | 1.88 | 0.11 |
| cg24396745 | 15 | 71447667  | HCN4      | 0.23 | 0.12 | 1.88 | 0.11 |
| cg10737521 | 5  | 179267849 | KIAA0676  | 0.23 | 0.12 | 1.85 | 0.10 |
| cg06101212 | 7  | 72822156  | CLDN3     | 0.29 | 0.16 | 1.85 | 0.13 |
| cg23591869 | 11 | 110675858 | FLJ45803  | 0.24 | 0.13 | 1.85 | 0.11 |
| cg24715735 | 19 | 40223243  | HPN       | 0.37 | 0.20 | 1.84 | 0.17 |
| cg13035743 | 6  | 32227663  | PRRT1     | 0.28 | 0.15 | 1.84 | 0.13 |
| cg26133068 | 22 | 22529008  | SLC2A11   | 0.35 | 0.19 | 1.83 | 0.16 |
| cg09715672 | 10 | 88718258  | C10orf116 | 0.25 | 0.14 | 1.83 | 0.11 |
| cg01546046 | 14 | 30564600  | AP4S1     | 0.26 | 0.14 | 1.81 | 0.12 |
| cg19764436 | 22 | 21743260  | GNAZ      | 0.25 | 0.14 | 1.81 | 0.11 |
| cg17272843 | 11 | 77411928  | KCTD14    | 0.29 | 0.16 | 1.81 | 0.13 |
| cg08569678 | 8  | 143778399 | LY6K      | 0.37 | 0.21 | 1.80 | 0.17 |
| cg20345446 | 11 | 3143380   | OSBPL5    | 0.31 | 0.17 | 1.79 | 0.14 |
| cg04452713 | 6  | 56815646  | DST       | 0.28 | 0.16 | 1.79 | 0.12 |
| cg26912636 | 20 | 55719797  | TMEPAI    | 0.47 | 0.27 | 1.76 | 0.20 |
| cg21517055 | 19 | 13877717  | MGC11271  | 0.41 | 0.23 | 1.76 | 0.18 |

|            |    |           |             |      |      |      |       |
|------------|----|-----------|-------------|------|------|------|-------|
| cg05380982 | 21 | 38210248  | KCNJ6       | 0.25 | 0.14 | 1.75 | 0.11  |
| cg09837977 | 7  | 110518437 | LRRN3       | 0.74 | 0.42 | 1.75 | 0.32  |
| cg04598121 | 8  | 57521059  | PENK        | 0.29 | 0.17 | 1.75 | 0.12  |
| cg04884908 | 2  | 72228348  | CYP26B1     | 0.25 | 0.15 | 1.75 | 0.11  |
| cg26385222 | 7  | 150128010 | HCA112      | 0.70 | 0.40 | 1.75 | 0.30  |
| cg20483374 | 11 | 118716856 | C1QTNF5     | 0.43 | 0.25 | 1.74 | 0.18  |
| cg02919422 | 8  | 55533097  | SOX17       | 0.31 | 0.18 | 1.74 | 0.13  |
| cg11680741 | 17 | 10266615  | MYH8        | 0.66 | 0.38 | 1.74 | 0.28  |
| cg21917349 | 15 | 27001152  | APBA2       | 0.36 | 0.21 | 1.72 | 0.15  |
| cg00643392 | 19 | 12807856  | RTBDN       | 0.35 | 0.21 | 1.72 | 0.15  |
| cg12457773 | 6  | 24234476  | VMP         | 0.25 | 0.15 | 1.71 | 0.10  |
| cg25689955 | 11 | 47558276  | KBTBD4      | 0.78 | 0.46 | 1.70 | 0.32  |
| cg12762799 | 12 | 8584809   | CLEC4E      | 0.48 | 0.28 | 1.70 | 0.20  |
| cg11797994 | 11 | 44287307  | ALX4        | 0.40 | 0.24 | 1.70 | 0.17  |
| cg04675937 | 9  | 21995419  | CDKN2B      | 0.31 | 0.18 | 1.69 | 0.13  |
| cg09305478 | 16 | 631989    | MGC15416    | 0.26 | 0.15 | 1.68 | 0.10  |
| cg09230173 | 9  | 70161179  | PGM5        | 0.26 | 0.15 | 1.68 | 0.10  |
| cg09188980 | 11 | 14949954  | CALCA       | 0.33 | 0.20 | 1.68 | 0.13  |
| cg00660989 | 14 | 44502266  | BTBD5       | 0.70 | 0.42 | 1.67 | 0.28  |
| cg26256793 | 1  | 103347057 | COL11A1     | 0.27 | 0.17 | 1.66 | 0.11  |
| cg23555120 | 12 | 105057993 | NUAK1       | 0.31 | 0.19 | 1.65 | 0.12  |
| cg19096540 | 5  | 133776090 | MGC13017    | 0.37 | 0.22 | 1.65 | 0.14  |
| cg11004890 | 20 | 3166500   | SLC4A11     | 0.72 | 0.44 | 1.65 | 0.28  |
| cg27360098 | 7  | 73080416  | ELN         | 0.52 | 0.32 | 1.63 | 0.20  |
| cg05067286 | 11 | 129191575 | TMEM45B     | 0.43 | 0.26 | 1.63 | 0.17  |
| cg13749822 | 4  | 145786113 | HHIP        | 0.56 | 0.35 | 1.62 | 0.22  |
| cg25358289 | 5  | 139992912 | CD14        | 0.33 | 0.21 | 1.61 | 0.13  |
| cg13817266 | 1  | 159761026 | HSPA6       | 0.49 | 0.30 | 1.60 | 0.18  |
| cg09606564 | 17 | 19230946  | MFAP4       | 0.38 | 0.24 | 1.57 | 0.14  |
| cg18087477 | 1  | 115199120 | SYCP1       | 0.59 | 0.38 | 1.53 | 0.20  |
| cg03733371 | 3  | 186753222 | LIPH        | 0.35 | 0.58 | 0.60 | -0.23 |
| cg05200628 | 1  | 158948384 | CD48        | 0.15 | 0.27 | 0.55 | -0.12 |
| cg20286074 | 17 | 39350062  | APR-2       | 0.24 | 0.44 | 0.54 | -0.20 |
| cg04340502 | 6  | 52883168  | GSTA3       | 0.15 | 0.29 | 0.52 | -0.14 |
| cg00061629 | 11 | 44281834  | ALX4        | 0.12 | 0.23 | 0.52 | -0.11 |
| cg05995267 | 16 | 29730030  | PRRT2       | 0.12 | 0.24 | 0.51 | -0.12 |
| cg16310717 | 12 | 4253880   | CCND2       | 0.10 | 0.21 | 0.48 | -0.11 |
| cg12832565 | 1  | 144427029 | CD160       | 0.12 | 0.27 | 0.47 | -0.14 |
| cg26954174 | 16 | 49288314  | NOD2_CARD15 | 0.15 | 0.34 | 0.44 | -0.19 |
| cg23732024 | 8  | 75066355  | LY96        | 0.10 | 0.23 | 0.43 | -0.13 |
| cg16363586 | 19 | 17377329  | BST2        | 0.08 | 0.19 | 0.41 | -0.11 |
| cg02057157 | 4  | 6768582   | CNO         | 0.07 | 0.19 | 0.38 | -0.12 |
| cg08471713 | 17 | 39094419  | MEOX1       | 0.25 | 0.67 | 0.38 | -0.42 |
| cg01253545 | 22 | 29886314  | RNF185      | 0.07 | 0.20 | 0.36 | -0.13 |
| cg27400772 | 19 | 43406904  | DPF1        | 0.06 | 0.18 | 0.35 | -0.12 |
| cg26131019 | 3  | 66633425  | LRIG1       | 0.04 | 0.14 | 0.25 | -0.11 |
