# Supplementary material for: Altered DNA Methylation in Leukocytes with Trisomy 21
Source: PubMed Central journal article supplement (PMC2987931; doi:10.1371/journal.pgen.1001212), 2010-11-18
Supplement: pgen.1001212.s014.pdf [file pgen.1001212.s014.pdf]

| Bisulfite Sequencing_COBRA_MS-Pyroseq | SNP ID or Infinium cg ID | Change in DS vs. normal PBL | Differentially methylated CpG sites | CpG sites Pyroseq | CpG sites | Temp  | COBRA Enzyme(s) | Upstream                                                    | Downstream                                                 | Converted                | size (bp) |
|---------------------------------------|--------------------------|-----------------------------|-------------------------------------|-------------------|-----------|-------|-----------------|-------------------------------------------------------------|------------------------------------------------------------|--------------------------|-----------|
| FAM62C                                | rs1720830                | GOM                         | CpG pos #1-10                       | 10                | 14        | 57→48 | BstUI           | TTGATTATAAAGGGTTAGAAATTATGG<br>CTGATCATTAAAGGGTTAGAAACCATGG | ATAAACTTAAACCTAACCCCAAC<br>GTAAGCTTGGACTAGCCCCAGC          | CONVERTED<br>UNCONVERTED | 290       |
| TCF7 upstream region                  | rs756699                 | LOM                         | CpG pos #1-8                        | 8                 | 8         | 57→48 | HpyCH4IV        | TTTTGTTTTGAGAGGATGTTTTATG<br>TTTTGCCCCTGAGAGGATGCCATG       | TTCTCATAACCTAAACCCACTTAATC<br>TTCTCATGGCCTGAGCCCACTTAATC   | CONVERTED<br>UNCONVERTED | 330       |
| TCF7 CGI                              | NA                       | GOM                         | CpG pos #1-17                       | 17                | 17        | 60→51 | NA              | AGGGGAGTTGTTGTTGATTGTAT<br>AGGGGAGCTGCTGTTGACTGCAT          | AACCCCTAACCTAACCCCTCTAAC<br>GACCCCTGGCCTGACTAACCCCTTAAC    | CONVERTED<br>UNCONVERTED | 216       |
| TMEM131 index                         | rs6760008                | LOM                         | CpG pos #9-21                       | 13                | 21        | 60→51 | BstUI/HpyCH4IV  | GGTAGGAAATGAGAGGGTAGTTAT<br>GGCAGGAAATGCAGAGGGCAGCCAC       | CCTAACCCACACAAACAAATACAAA<br>CCTGACCACACAGCAGGATGCAGG      | CONVERTED<br>UNCONVERTED | 339       |
| TMEM131 CGI                           | NA                       | none                        | NA                                  |                   | 34        | 57→48 | NA              | GAAGGAGGGAGGTAGTTTAGG<br>GAAGGAGGGAGGAGGCCAGGTC             | TCAAAAAACACCATCAAAAACTAA<br>TCAAGGAAGCACCATCAAGAACTGAG     | CONVERTED<br>UNCONVERTED | 360       |
| SH3BP2 CGI                            | cg08822227               | GOM                         | CpG pos #8-17                       | 17                | 17        | 56→47 | BstUI           | TAGATTTTTGGTTTTTTGGAGAATT<br>CAGACCCTGCCTCTTGAGAATC         | ACACCTACCAATCCACACAACCTA<br>ACACCTGCCAGTCCACACAGCTTG       | CONVERTED<br>UNCONVERTED | 258       |
| EIF4E                                 | cg14972143               | GOM                         | CpG pos #3-16                       | 14                | 16        | 57→48 | HpyCH4IV        | GTTTAGTTAATGTTGGTGGTTATT<br>GCTCAGCTAATGCTGGTGGTCATT        | CTAACATCTAAACTTAAACTATTTC<br>CTGGCATCTGGACTTAGGCTATTTC     | CONVERTED<br>UNCONVERTED | 246       |
| SUMO3                                 | cg21053323               | GOM                         | CpG pos #7-13                       | 11                | 11        | N/A   | N/A             | TTTATAGGGGTTAGGTTTTTAGAG<br>CTCACAGGGGCCAGGCCCTCAGAG        | TCTCCTAAATCATTACTAATTAATAATC<br>TCTCTGAGTCATTGCTGGTTGGGGTC | CONVERTED<br>UNCONVERTED | 149       |
| PLD6/LOC201164                        | cg05590257               | GOM                         | CpG pos #1-16                       | 16                | 22        | 57→48 | BstUI           | TTTTTTTTAAGTGTATTTTTTG<br>CCTCCCCTAAGTGTCCACCTTTG           | CCAACCTAAATCTCTACCTATTC<br>CCAGCCTGGATCTCTGCCTGTTC         | CONVERTED<br>UNCONVERTED | 235       |
| CD3Z                                  | cg09554443               | LOM                         | CpG pos #9-11                       | 3                 | 11        | 63→54 | BstUI/Hpy188III | GGGTAGGATTTGAAGGAGATTTTAG<br>GGGCAGGATTTGAAGGAGACCCAG       | CAATCTCCACTTCTAAAAAATA<br>CAGTCTCCACTTCTGGGGAGGTA          | CONVERTED<br>UNCONVERTED | 300       |
| CPT1B                                 | cg00983520               | GOM                         | CpG pos #1-10                       | 10                | 9         | 60→51 | NA              | AGGAATTTGATATTTATTTTAAAT<br>AGGAACCTGACACCTACTCCAAT         | ACTCCAAACCTTTAAACACCT<br>GCTCCAGACCTTTGAGCAACCT            | CONVERTED<br>UNCONVERTED | 139       |
| NOD2                                  | cg26954174               | LOM                         | N/A                                 | N/A               | 6         | 61→52 | NA              | GATGTAGTTGTTGGGAGGATAGAGT<br>GATGTAGCTGCTGGGAGGACAGAC       | CCCCACTAAAAACATAAACACATT<br>CCCCACTGGGGACATGAGACACATT      | CONVERTED<br>UNCONVERTED | 207       |
| <b>Q-PCR</b>                          | <b>Exons</b>             | <b>Primer Set</b>           |                                     |                   |           |       |                 | <b>Upstream</b>                                             | <b>Downstream</b>                                          |                          |           |
| TMEM131 long isoform                  | Ex 19-20                 | F5/R5                       |                                     |                   |           |       |                 | CAATAATTTCAAGCCTGCCAGA                                      | CGGTATAGCCTGAAGCTAATGTTACCG                                |                          | 76        |
| TMEM131 short isoform                 | 5'UTR to Ex3             | F3/R3                       |                                     |                   |           |       |                 | GACATGAGGCTGAGCGATG                                         | GAACGAATTGAGGGGAGTGA                                       |                          | 422       |
| TCF7                                  | Ex 2-4 long isoforms     | F2/R2 (KK)                  |                                     |                   |           |       |                 | TACTCGCCTTCAATCTGCT                                         | TGCTGAGGTCAGGGAGTAG                                        |                          | 241       |
| NOD2                                  | Ex 3-4                   | F4/R4                       |                                     |                   |           |       |                 | GCCTCGCCTTGAAGCTGC                                          | CGCTTCTCATCAGGTACTGAGGAAGCG                                |                          | 97        |
| NPDC1                                 | Ex 7-8                   | F2/R2                       |                                     |                   |           |       |                 | CGTTGTACCCTACCAGCACCACG                                     | GCTCCTTGGGTGGCTCTTTATG                                     |                          | 68        |
| HPRT                                  | ex 4-6                   | F3/R3                       |                                     |                   |           |       |                 | GACCAAGTCAACAGGGGACAT                                       | CCTGACCAAGGAAAGCAAAG                                       |                          | 132       |
